# Supplementary material
Source: ML conference proceedings conference paper supplement (https://proceedings.neurips.cc/paper_files/paper/2023/hash/f4b768188be63b8d2680a46934fd295a-Abstract.html)
Supplement: Supplementary file 1 [file f4b768188be63b8d2680a46934fd295a-Supplemental-Conference.zip]

Archive with 1 entries (1 files):
- gekcs-camera-ready-supplementary.pdf
